# Supplementary material
Source: publisher figshare collection journal article supplement (https://plos.figshare.com/ndownloader/files/31078734)
Supplement: Supplementary file [file 31078734]

**S4 Table.** Plasmids used in this study. S5 Table indicates genes expressed from pZE21\_tetR.

| Plasmid        | crRNA promoter, sequence (5'-3')                   | Notes                                                                                                                                                                                                                                                              | Refs                    | Purpose                                                                        |
|----------------|----------------------------------------------------|--------------------------------------------------------------------------------------------------------------------------------------------------------------------------------------------------------------------------------------------------------------------|-------------------------|--------------------------------------------------------------------------------|
| pZE21_tetR     | n/a                                                | Contains tetR behind pLac promoter for inducible expression of candidate Acrs. Targeted by crRNA_A; PAM = AGG.                                                                                                                                                     | (Forsberg et al., 2019) | Expressing genes to test <i>in vivo</i> anti-CRISPR activity                   |
| pSpyCas9_crA   | pJ23100, GTTCATTCAGGGCAC CCGAC                     | Arabinose-inducible SpyCas9 with pZE21 targeting pZE21_tetR                                                                                                                                                                                                        | (Forsberg et al., 2019) | Target pZE21_tetR for elimination with SpyCas9                                 |
| pSpyCas9_crMu  | pJ23100, GTAATACTTGTCCCGC AAAG                     | Mu-targeting spacer for phage Mu immunity testing. Otherwise identical to pSpyCas9_crA                                                                                                                                                                             | (Forsberg et al., 2019) | Phage Mu immunity testing                                                      |
| pSpyCa9_crNT   | pJ23100, GAACGAAAAGCTGCG CCGGG                     | non-targeting spacer used as control. Otherwise identical to pSpyCas9_crA                                                                                                                                                                                          | (Forsberg et al., 2019) | Phage Mu immunity testing, Western blots                                       |
| pCloDF13_GFP   | pJ23100, GAACGAAAAGCTGCG CCGGG                     | <i>eGFP</i> gene replaces <i>spyCas9</i> in pSpyCas9_crA                                                                                                                                                                                                           |                         | Measure generic protein expression from pSpyCas9 expression vector             |
| pIDTsmart      | n/a                                                | Plasmid used for <i>in-vitro</i> SpyCas9 digestion. Sequence available at: <a href="https://www.idtdna.com/pages/products/genes-and-gene-fragments/custom-gene-synthesis">https://www.idtdna.com/pages/products/genes-and-gene-fragments/custom-gene-synthesis</a> |                         | Plasmid template for <i>in-vitro</i> nuclease reactions                        |
| pET15b/HE      | n/a                                                | Novagen Cat. No. 69661-3; pET15 variants 'b' and 'HE' differ only by a few bases upstream of the N-terminal thrombin cut site                                                                                                                                      |                         | Protein purification                                                           |
| pSpyCas9_Fig3C | n/a                                                | J23100 promoter expressing a theophylline inducible SpyCas9, used in Fig 3C                                                                                                                                                                                        | (Uribe et al., 2019)    | Testing AcrIIA22 activity against a panel of Cas9 and Cas12 effector nucleases |
| pNmCas9_Fig3C  | n/a                                                | J23100 promoter expressing a theophylline inducible NmCas9, used in Fig 3C                                                                                                                                                                                         | (Uribe et al., 2019)    | Testing AcrIIA22 activity against a panel of Cas9 and Cas12 effector nucleases |
| pLbCas12_Fig3C | n/a                                                | J23100 promoter expressing a theophylline inducible LbCas12, used in Fig 3C                                                                                                                                                                                        | (Uribe et al., 2019)    | Testing AcrIIA22 activity against a panel of Cas9 and Cas12 effector nucleases |
| pFnCas12_Fig3C | n/a                                                | J23100 promoter expressing a theophylline inducible FnCas12, used in Fig 3C                                                                                                                                                                                        | (Uribe et al., 2019)    | Testing AcrIIA22 activity against a panel of Cas9 and Cas12 effector nucleases |
| pDual4_Spy     | P <sub>BAD</sub> , GTTCATTCAGGGCAC CCGAC           | Arabinose inducible gRNA for SpyCas9 targeting pZE21                                                                                                                                                                                                               | (Uribe et al., 2019)    | Testing AcrIIA22 activity against a panel of Cas9 and Cas12 effector nucleases |
| pDual4_Nm      | P <sub>BAD</sub> , GAACACGGCGGCATC AGAGC           | Arabinose inducible gRNA for NmCas9 targeting pZE21                                                                                                                                                                                                                | (Uribe et al., 2019)    | Testing AcrIIA22 activity against a panel of Cas9 and Cas12 effector nucleases |
| pDual4_Lb      | P <sub>BAD</sub> , TCAAGACCGACCTGT CCGGTGCCCTGAATG | Arabinose inducible gRNA for LbCas12 targeting pZE21                                                                                                                                                                                                               | (Uribe et al., 2019)    | Testing AcrIIA22 activity against a panel of Cas9 and Cas12 effector nucleases |
| pDual4_Fn      | P <sub>BAD</sub> , TCAAGACCGACCTGT CCGGTGCCCTGAATG | Arabinose inducible gRNA for FnCas12 targeting pZE21                                                                                                                                                                                                               | (Uribe et al., 2019)    | Testing AcrIIA22 activity against a panel of Cas9 and Cas12 effector nucleases |

#### **References for S4 Table.**

Forsberg, K.J., Bhatt, I.V., Schmidtke, D.T., Javanmardi, K., Dillard, K.E., Stoddard, B.L., Finkelstein, I.J., Kaiser, B.K., and Malik, H.S. (2019). Functional metagenomics-guided discovery of potent Cas9 inhibitors in the human microbiome. *Elife* 8.

Uribe, R.V., van der Helm, E., Misiakou, M.A., Lee, S.W., Kol, S., and Sommer, M.O.A. (2019). Discovery and Characterization of Cas9 Inhibitors Disseminated across Seven Bacterial Phyla. *Cell Host Microbe* 25, 233-241 e235.
